# Supplementary material
Source: Springer Nature journal article supplement (https://www.springermedizin.de/resource/supplementary/12885_2013_3973_MOESM6_ESM.pdf/9464924)

**a**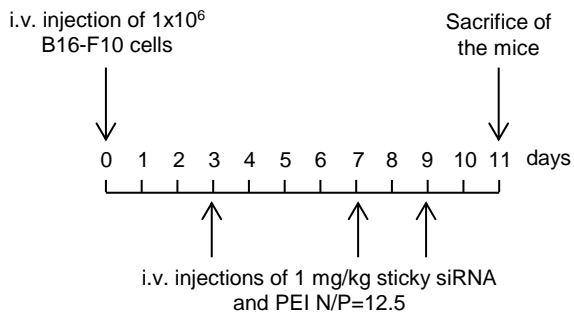**c**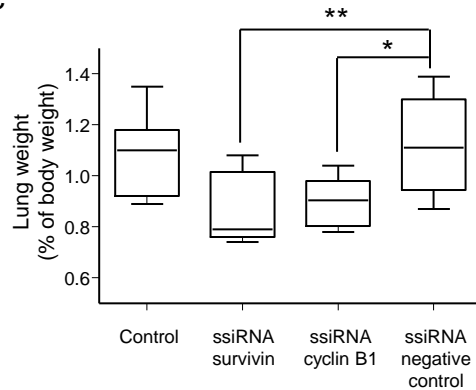**b**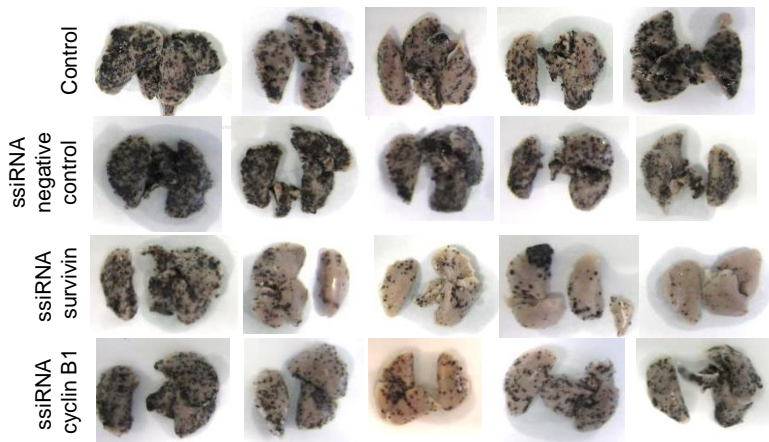**d**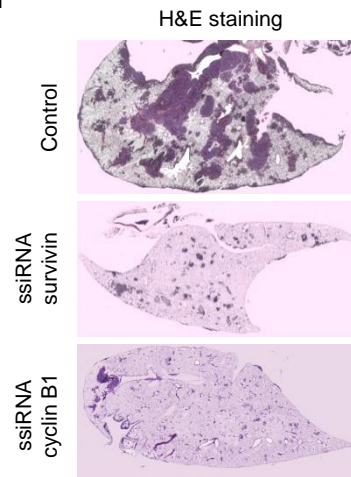

Supplement: MOESM6 [file 9464924]
